# Supplementary material
Source: MDPI journal article supplement (https://www.mdpi.com/1996-1073/10/2/181)
Supplement: s1 [file s1]

## Sheet: Sheet1
Date Hour	Global wh/sqm	Diffuse wh/sqm
27/03/2015 00	-2.23533	-2.11244
27/03/2015 01	-2.2604	-2.1178
27/03/2015 02	-2.09997	-1.98503
27/03/2015 03	-1.99935	-1.86361
27/03/2015 04	-1.78181	-1.66124
27/03/2015 05	-0.0660086	0.0456522
27/03/2015 06	35.168	35.2578
27/03/2015 07	126.347	122.361
27/03/2015 08	245.591	217.108
27/03/2015 09	459.29	195.713
27/03/2015 10	583.252	208.783
27/03/2015 11	552.867	326.499
27/03/2015 12	595.001	359.688
27/03/2015 13	449.85	300.613
27/03/2015 14	341.77	265.412
27/03/2015 15	302.728	195.553
27/03/2015 16	186.431	141.857
27/03/2015 17	78.9175	61.136
27/03/2015 18	7.34596	6.2961
27/03/2015 19	-1.76217	-1.53898
27/03/2015 20	-2.02163	-1.81695
27/03/2015 21	-1.90314	-1.69406
27/03/2015 22	-1.63506	-1.4862
27/03/2015 23	-1.44889	-1.29225
28/03/2015 00	-0.602064	-0.445234
28/03/2015 01	-0.492181	-0.349201
28/03/2015 02	-1.6267	-1.38106
28/03/2015 03	-1.43027	-1.18391
28/03/2015 04	-1.39371	-1.1401
28/03/2015 05	-0.524606	-0.293502
28/03/2015 06	27.0699	27.4408
28/03/2015 07	79.0844	79.5541
28/03/2015 08	91.8106	92.2649
28/03/2015 09	160.728	161.098
28/03/2015 10	229.401	215.849
28/03/2015 11	267.699	261.437
28/03/2015 12	621.473	203.558
28/03/2015 13	494.221	313.461
28/03/2015 14	509.658	161.233
28/03/2015 15	416.567	110.466
28/03/2015 16	192.423	84.3347
28/03/2015 17	55.6476	51.1673
28/03/2015 18	3.12156	3.19394
28/03/2015 19	-2.2834	-2.24124
28/03/2015 20	-1.79523	-1.70924
28/03/2015 21	-1.65251	-1.50283
28/03/2015 22	-1.20879	-1.09857
28/03/2015 23	-1.06681	-1.04859
29/03/2015 00	-1.35243	-1.29667
29/03/2015 01	-1.69309	-1.61459
29/03/2015 02	-1.82069	-1.73646
29/03/2015 03	-1.30371	-1.23015
29/03/2015 04	-1.07358	-0.996554
29/03/2015 05	-0.447051	-0.377733
29/03/2015 06	23.8114	23.904
29/03/2015 07	23.4399	23.511
29/03/2015 08	60.0355	60.1276
29/03/2015 09	109.086	109.143
29/03/2015 10	178.773	178.792
29/03/2015 11	297.877	269.296
29/03/2015 12	160.491	160.19
29/03/2015 13	243.543	232.497
29/03/2015 14	157.059	147.804
29/03/2015 15	183.172	146.42
29/03/2015 16	85.9959	85.7218
29/03/2015 17	34.1736	32.8434
29/03/2015 18	6.19338	6.16061
29/03/2015 19	-1.56511	-1.54226
29/03/2015 20	-1.5316	-1.63807
29/03/2015 21	-1.58915	-1.52838
29/03/2015 22	-1.53463	-1.43459
29/03/2015 23	-0.931449	-0.846823
30/03/2015 00	-1.58304	-1.46514
30/03/2015 01	-2.14792	-2.017
30/03/2015 02	-2.09316	-1.96181
30/03/2015 03	-1.73975	-1.6143
30/03/2015 04	-1.74673	-1.6603
30/03/2015 05	0.801406	0.850865
30/03/2015 06	36.7302	34.9558
30/03/2015 07	154.616	90.7755
30/03/2015 08	337.222	170.309
30/03/2015 09	372.514	275.789
30/03/2015 10	527.312	238.551
30/03/2015 11	689.653	300.378
30/03/2015 12	483.744	394.361
30/03/2015 13	476.446	358.772
30/03/2015 14	314.277	278.562
